# Supplementary material for: Beauveria bassiana (Hypocreales: Clavicipitaceae) Volatile Organic Compounds (VOCs) Repel Rhynchophorus ferrugineus (Coleoptera: Dryophthoridae)
Source: MDPI journal article supplement (doi:10.3390/jof8080843), 2022-08-11
Supplement: s1 [file s1]

Supplementary Materials

# ***Beauveria bassiana* (Hypocreales: Clavicipitaceae) Volatile Organic Compounds (VOCs) Repel *Rhynchophorus ferrugineus* (Coleoptera: Dryophthoridae)**

Johari Jalinas <sup>1,2,3</sup>, Federico Lopez-Moya <sup>1,\*</sup>, Frutos C. Marhuenda-Egea <sup>2,4</sup> and Luis Vicente Lopez-Llorca <sup>1,2</sup>

<sup>1</sup> Laboratory of Plant Pathology, Department of Marine Sciences and Applied Biology, University of Alicante, 03080 Alicante, Spain; johari\_j@ukm.edu.my (J.J.); lv.lopez@ua.es (L.V.L.-L.)

<sup>2</sup> Multidisciplinary Institute for Environmental Studies (MIES) Ramon Margalef, University of Alicante, 03080 Alicante, Spain; frutos@gcloud.ua.es

<sup>3</sup> Department of Biological Sciences and Biotechnology, Faculty of Science and Technology, Universiti Kebangsaan Malaysia (UKM), Selangor 43600, Malaysia

<sup>4</sup> Department of Agrochemistry and Biochemistry, University of Alicante, 03080 Alicante, Spain

\* Correspondence: federico.lopez@ua.es

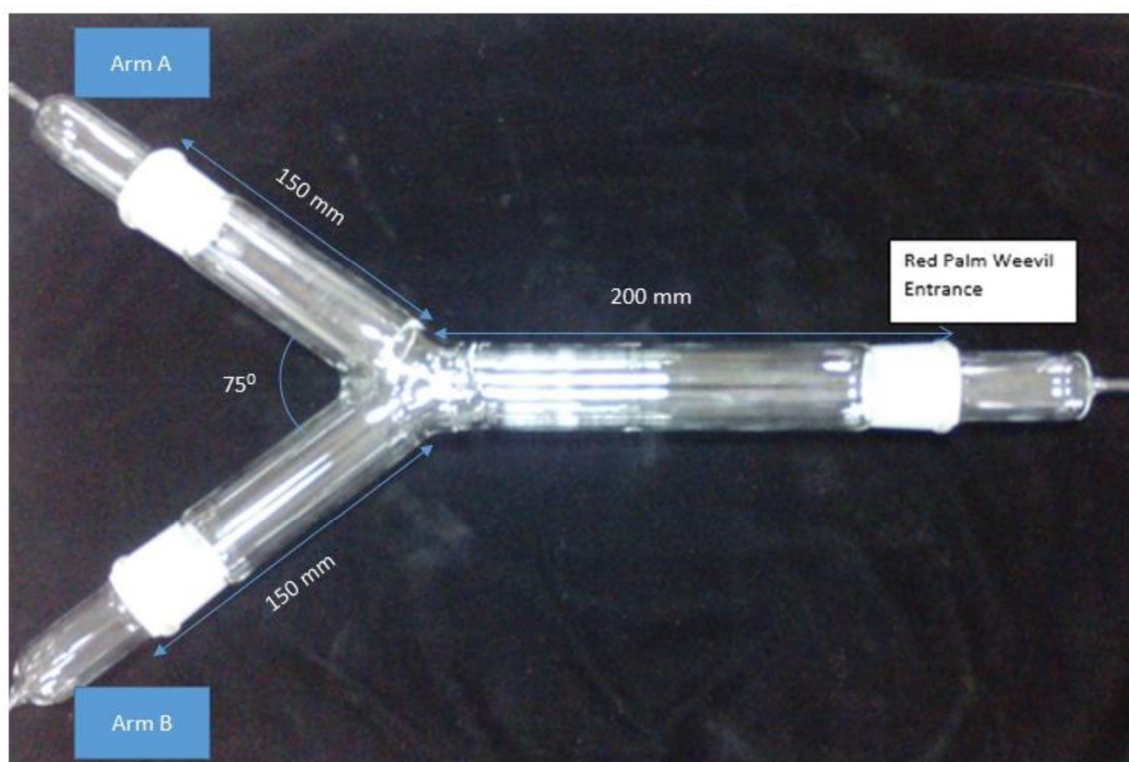

**Figure S1.** Tube Y olfactometer to test the response of adult red palm weevil (female) on different chemical stimuli.

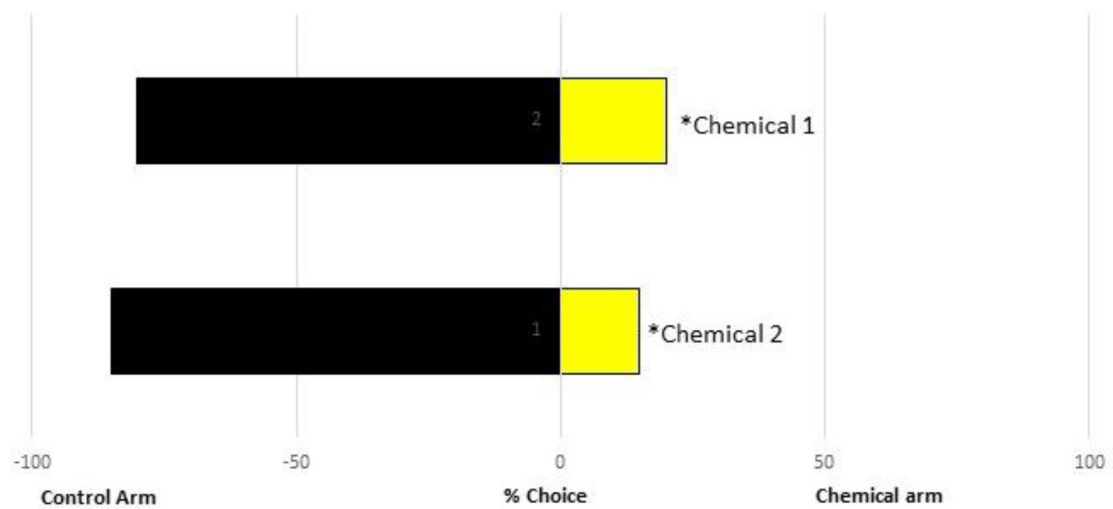

**Figure S2.** Response of a *Rhynchophorus ferrugineus* female in a Y-tube olfactometer (10 min) when given a choice between environmental air (control) and odour stimulus (Chemical stimuli) individuals per choice test. \* Indicates significant difference within a choice test ( $P < 0.01$ , chi-square).
